# Supplementary material for: Polymorphism in parabanic acid-urea cocrystals governed by supramolecular synthons: a comparative analysis
Source: Royal Society of Chemistry journal article supplement (doi:10.1039/d3ce00258f), 2023-01-01
Supplement: d3ce00258f1.pdf [file d3ce00258f1.pdf]

## **Polymorphism in parabanic acid-urea cocrystals governed by Supramolecular Synthons: A comparative analysis**

Ruchi Gaur<sup>a\*</sup>

*Solid State and Structural Chemistry Unit, Indian Institute of Science, Bangalore-560012,  
India*

### **Contents List**

|                                                                                               |       |            |
|-----------------------------------------------------------------------------------------------|-------|------------|
| IR spectra of <i>PA-UA Form I and PA-UA Form II</i>                                           | ..... | <b>SI1</b> |
| TGA of <i>PA-UA Form I and PA-UA Form II</i>                                                  | ..... | <b>SI2</b> |
| DSC of <i>PA-UA Form I and PA-UA Form II</i>                                                  | ..... | <b>SI3</b> |
| The interaction energies of the molecular pairs (kJ/mol) in <i>PA-UA Form I and Form II</i> . | ..... | <b>SI4</b> |

SI 1

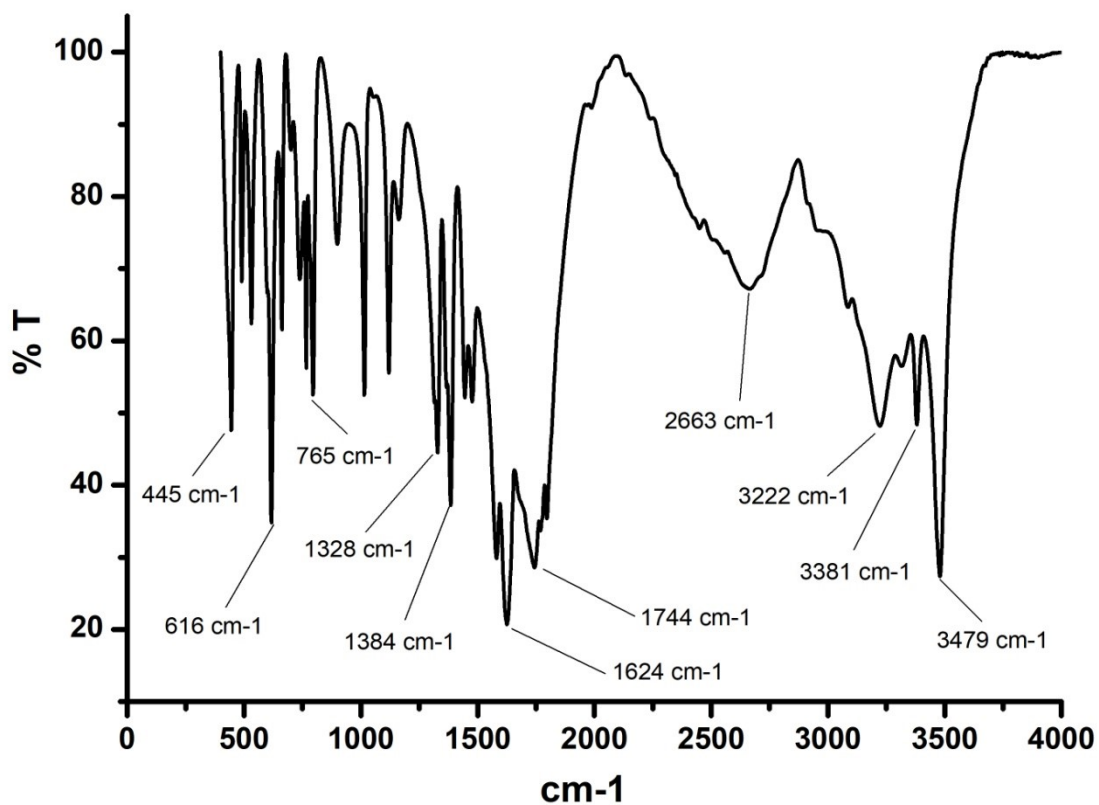

IR spectrum of *PA-UA Form I*

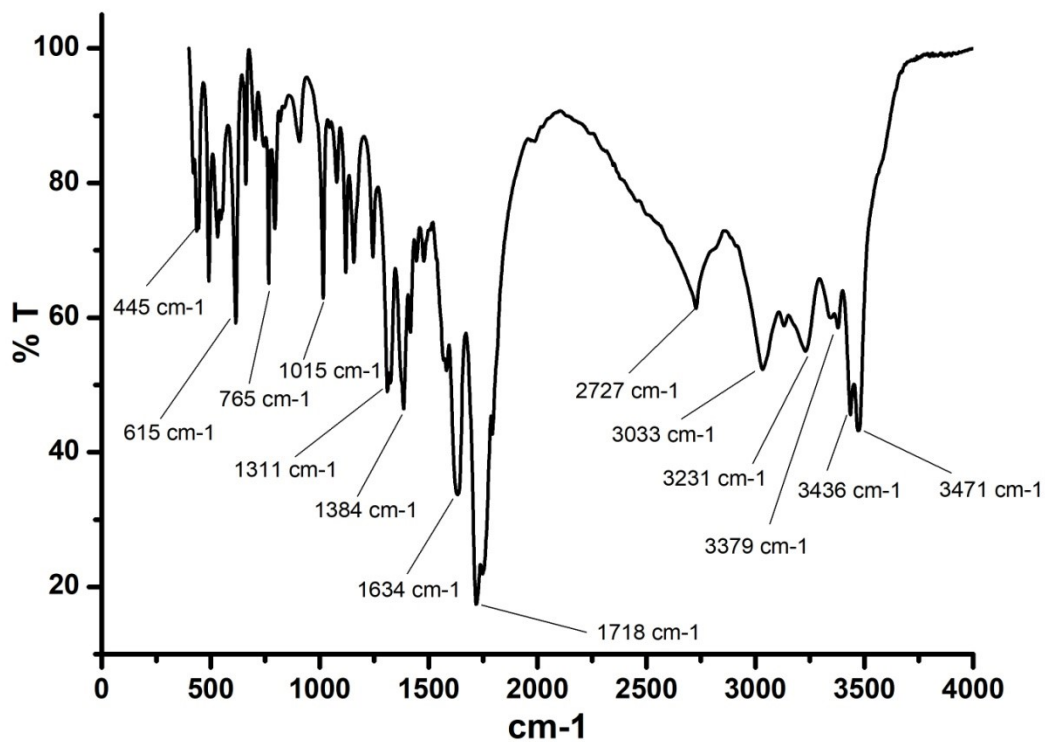

IR spectra of *PA-UA Form II*

SI 2

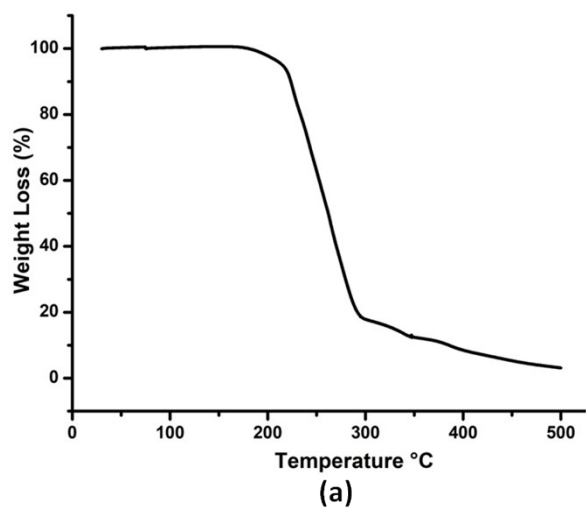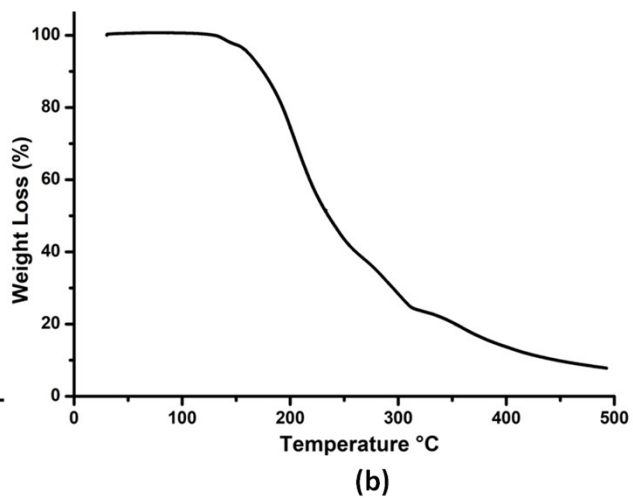

TGA of (a) *PA-UA Form I* (b) *PA-UA Form II*

SI3

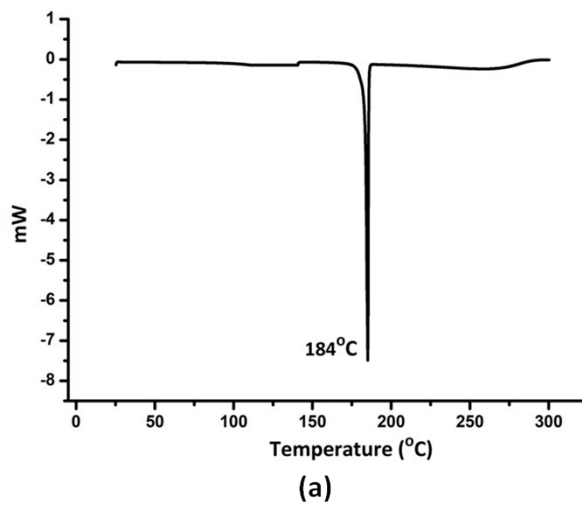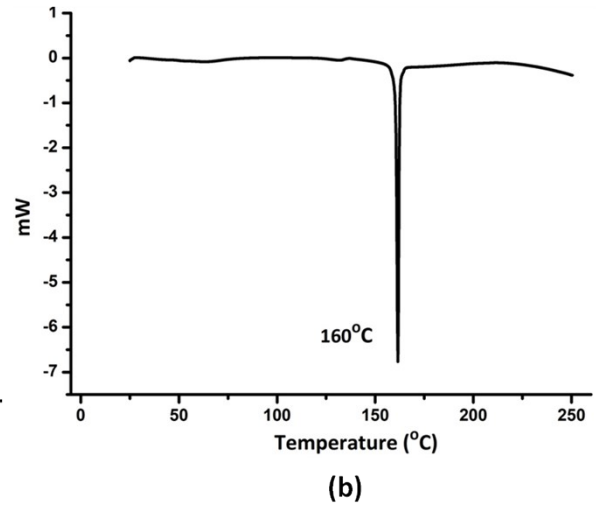

DSC containing endothermic peak observed (a) *PA-UA Form I* (b) *PA-UA Form II*

## SI 4

The interaction energies of the molecular pairs (kJ/mol) in *PA-UA Form I* and *Form II*.

| N                    | Symmetry Operations | R(Å) | Electron Density | E <sub>ele</sub> | E <sub>pol</sub> | E <sub>dis</sub> | E <sub>rep</sub> | E <sub>tot</sub> |
|----------------------|---------------------|------|------------------|------------------|------------------|------------------|------------------|------------------|
| <b>PA-UA Form I</b>  |                     |      |                  |                  |                  |                  |                  |                  |
| 1                    | -x, -y, -z          | 6.26 | B3LYP/6-31G(d,p) | -5.4             | -0.8             | -5.7             | 3.2              | -9.4             |
| 2                    | -x, y+1/2, -z+1/2   | 4.74 | B3LYP/6-31G(d,p) | -24.7            | -3.9             | -14.3            | 19.6             | -29.4            |
| 1                    | -x, -y, -z          | 5.77 | B3LYP/6-31G(d,p) | -72.0            | -15.7            | -12.4            | 75.1             | -52.1            |
| 1                    | -                   | 7.71 | B3LYP/6-31G(d,p) | 8.5              | -1.3             | -5.9             | 0.9              | 3.5              |
| 2                    | x, y, z             | 5.58 | B3LYP/6-31G(d,p) | 8.5              | -1.3             | -5.9             | 0.9              | 3.5              |
| 2                    | x, -y+1/2, z+1/2    | 7.30 | B3LYP/6-31G(d,p) | 4.4              | -0.6             | -2.3             | 0.4              | 2.4              |
| 1                    | -                   | 4.79 | B3LYP/6-31G(d,p) | -5.4             | -0.8             | -5.7             | 3.2              | -9.4             |
| 1                    | -                   | 3.97 | B3LYP/6-31G(d,p) | -0.2             | -0.0             | -0.2             | 0.0              | -0.4             |
| 1                    | -                   | 3.76 | B3LYP/6-31G(d,p) | -72.0            | -15.7            | -12.4            | 75.1             | -52.1            |
| 1                    | -                   | 6.64 | B3LYP/6-31G(d,p) | 0.3              | -0.0             | -0.1             | 0.0              | 0.2              |
| 1                    | -                   | 5.70 | B3LYP/6-31G(d,p) | -24.7            | -3.9             | -14.3            | 19.6             | -29.4            |
| 1                    | -                   | 5.95 | B3LYP/6-31G(d,p) | -24.7            | -3.9             | -14.3            | 19.6             | -29.4            |
| <b>PA-UA Form II</b> |                     |      |                  |                  |                  |                  |                  |                  |
| 1                    | -                   | 4.30 | B3LYP/6-31G(d,p) | -1.8             | -1.9             | -10.3            | 4.6              | -9.5             |
| 1                    | -x, -y, -z          | 7.22 | B3LYP/6-31G(d,p) | -0.1             | -0.6             | -1.9             | 0.5              | -1.9             |
| 2                    | -x, y+1/2, -z+1/2   | 5.89 | B3LYP/6-31G(d,p) | -16.8            | -4.9             | -9.9             | 12.2             | -22.5            |
| 1                    | -                   | 6.23 | B3LYP/6-31G(d,p) | -3.9             | -2.3             | -5.9             | 8.8              | -5.4             |
| 1                    | -                   | 5.52 | B3LYP/6-31G(d,p) | -4.7             | -0.8             | -3.4             | 0.3              | -8.4             |
| 1                    | -x, -y, -z          | 4.77 | B3LYP/6-31G(d,p) | -2.3             | -1.7             | -14.9            | 8.2              | -11.5            |
| 2                    | x, -y+1/2, z+1/2    | 5.49 | B3LYP/6-31G(d,p) | -2.9             | -1.5             | -6.8             | 2.5              | -8.6             |
| 1                    | -                   | 5.59 | B3LYP/6-31G(d,p) | -13.9            | -5.3             | -8.5             | 14.3             | -17.1            |
| 1                    | -                   | 3.55 | B3LYP/6-31G(d,p) | -18.6            | -6.7             | -18.0            | 19.1             | -28.5            |
| 1                    | -                   | 4.86 | B3LYP/6-31G(d,p) | 2.9              | -1.3             | -8.0             | 3.7              | -2.6             |
| 1                    | -                   | 4.80 | B3LYP/6-31G(d,p) | -90.4            | -23.0            | -12.3            | 89.3             | -68.1            |
| 1                    | -                   | 6.30 | B3LYP/6-31G(d,p) | -14.2            | -3.3             | -4.4             | 18.1             | -10.1            |

|   |            |      |                  |      |      |      |     |      |
|---|------------|------|------------------|------|------|------|-----|------|
| 1 | -x, -y, -z | 6.13 | B3LYP/6-31G(d,p) | -4.5 | -0.5 | -5.3 | 1.4 | -8.9 |
|---|------------|------|------------------|------|------|------|-----|------|
